# Supplementary material for: The Accelerate Pheno™ System—A New Tool in Microbiological Diagnostics of Bloodstream Infections: A Pilot Study from Poland
Source: MDPI journal article supplement (doi:10.3390/pathogens11121415), 2022-11-24
Supplement: s1 [file s1]

**Table S1. Gram-positive bacteria and yeasts detectable by the Accelerate Pheno™ system, the corresponding antimicrobials included in their antimicrobial susceptibility testing and selected resistance mechanisms**

| Gram-positive bacteria             | Identification | Methicillin resistance | Ampicillin | Ceftaroline | Vancomycin | Linezolid | Daptomycin | Trimethoprim/<br>sulfamethoxazole |
|------------------------------------|----------------|------------------------|------------|-------------|------------|-----------|------------|-----------------------------------|
| <i>Staphylococcus aureus</i>       | •              | •                      |            | •           | •          | •         | •          | •                                 |
| <i>Staphylococcus lugdunensis</i>  | •              | •                      |            | •           | •          | •         | •          | •                                 |
| <i>Staphylococcus capitis</i>      |                |                        |            |             |            |           |            |                                   |
| <i>Staphylococcus epidermidis</i>  |                |                        |            |             |            |           |            |                                   |
| <i>Staphylococcus haemolyticus</i> | • <sup>1</sup> | •                      |            |             | •          | •         | •          |                                   |
| <i>Staphylococcus hominis</i>      |                |                        |            |             |            |           |            |                                   |
| <i>Staphylococcus warneri</i>      |                |                        |            |             |            |           |            |                                   |
| <i>Streptococcus agalactiae</i>    | •              |                        |            |             |            |           |            |                                   |
| <i>Streptococcus gallolyticus</i>  |                |                        |            |             |            |           |            |                                   |
| <i>Streptococcus mitis</i>         | • <sup>2</sup> |                        |            |             |            |           |            |                                   |
| <i>Streptococcus oralis</i>        |                |                        |            |             |            |           |            |                                   |
| <i>Streptococcus pneumoniae</i>    |                |                        |            |             |            |           |            |                                   |
| <i>Enterococcus faecalis</i>       | •              |                        | •          |             | •          | •         | •          |                                   |
| <i>Enterococcus faecium</i>        | •              |                        | •          |             | •          | •         | •          |                                   |
| <b>Yeasts</b>                      |                |                        |            |             |            |           |            |                                   |
| <i>Candida albicans</i>            | •              |                        |            |             |            |           |            |                                   |
| <i>Candida glabrata</i>            | •              |                        |            |             |            |           |            |                                   |

<sup>1</sup> identified as Coagulase-Negative *Staphylococcus* spp.

<sup>2</sup> identified as *Streptococcus* spp.

• detectable

**Table S2. Gram-negative bacteria detectable by the Accelerate Pheno™ system, the corresponding antimicrobials included in their antimicrobial susceptibility testing and selected resistance mechanisms**

| Gram-negative bacteria         | Identification | AmpC screen | Ampicillin | Amoxicillin/<br>clavulanic acid | Piperacillin/<br>tazobactam | Ceftazidime/<br>avibactam | Ceftolozane/<br>tazobactam | Cefazolin | Cefuroxime | Ceftriaxone | Ceftazidime | Cefepime | Aztreonam | Meropenem | Ertapenem | Gentamicin | Tobramycin | Amikacin | Trimethoprim/<br>sulfamethoxazole | Ciprofloxacin | Colistin |
|--------------------------------|----------------|-------------|------------|---------------------------------|-----------------------------|---------------------------|----------------------------|-----------|------------|-------------|-------------|----------|-----------|-----------|-----------|------------|------------|----------|-----------------------------------|---------------|----------|
| <i>Escherichia coli</i>        | •              | •           | •          | •                               | •                           | •                         | •                          | •         | •          | •           | •           | •        | •         | •         | •         | •          | •          | •        | •                                 | •             | •        |
| <i>Klebsiella pneumoniae</i>   |                |             |            |                                 |                             |                           |                            |           |            |             |             |          |           |           |           |            |            |          |                                   |               |          |
| <i>Klebsiella oxytoca</i>      | •              | •           |            | •                               | •                           | •                         | •                          | •         | •          | •           | •           | •        | •         | •         | •         | •          | •          | •        | •                                 | •             | •        |
| <i>Klebsiella aerogenes</i>    |                |             |            |                                 |                             |                           |                            |           |            |             |             |          |           |           |           |            |            |          |                                   |               |          |
| <i>Proteus mirabilis</i>       | •              | •           |            | •                               | •                           | •                         | •                          |           | •          | •           | •           | •        | •         | •         | •         | •          | •          | •        | •                                 | •             |          |
| <i>Proteus vulgaris</i>        |                |             |            |                                 |                             |                           |                            |           |            |             |             |          |           |           |           |            |            |          |                                   |               |          |
| <i>Enterobacter spp.</i>       | •              |             |            |                                 | •                           | •                         | •                          |           |            | •           | •           | •        | •         | •         | •         | •          | •          | •        | •                                 | •             | •        |
| <i>Citrobacter freundii</i>    | •              | •           |            | •                               | •                           | •                         | •                          |           | •          | •           | •           | •        | •         | •         | •         | •          | •          | •        | •                                 | •             | •        |
| <i>Citrobacter koseri</i>      |                |             |            |                                 |                             |                           |                            |           |            |             |             |          |           |           |           |            |            |          |                                   |               |          |
| <i>Serratia marcescens</i>     | •              |             |            |                                 | •                           | •                         | •                          |           |            | •           | •           | •        | •         | •         | •         | •          | •          | •        | •                                 | •             |          |
| <i>Pseudomonas aeruginosa</i>  | •              |             |            |                                 | •                           | •                         | •                          |           |            |             | •           | •        | •         | •         |           | •          | •          | •        |                                   | •             | •        |
| <i>Acinetobacter baumannii</i> | •              |             |            |                                 | •                           |                           |                            |           |            |             |             | •        |           | •         |           |            |            | •        | •                                 | •             | •        |

• detectable

**Table S3. The pre-incubation times of blood samples (n=45) in BD BACTEC™ FX**

| Test No.   | The time of BD BACTEC™ FX<br>pre-incubation (d:h:min) | Test No.   | The time of BD BACTEC™ FX<br>pre-incubation (d:h:min) | Test No.   | The time of BD BACTEC™ FX<br>pre-incubation (d:h:min) |
|------------|-------------------------------------------------------|------------|-------------------------------------------------------|------------|-------------------------------------------------------|
| 14133/KRCT | 1:02:19                                               | 14285/KRB  | 0:08:45                                               | 17244/KRT  | 0:11:40                                               |
| 15875/KRCB | 0:07:13                                               | 11768/KRCB | 0:16:19                                               | 17213/KRT  | 0:07:53                                               |
| 25373/KRCB | 0:08:38                                               | 73865/KRT  | 0:09:10                                               | 15007/KRCT | 1:14:38                                               |
| 36677/KRT  | 0:09:48                                               | 36510/KRT  | 0:11:45                                               | 24341/KRT  | 0:10:46                                               |
| 11620/KRT  | 0:23:34                                               | 30827/KRCB | 0:05:58                                               | 11542/KRCT | 0:15:45                                               |
| 24095/KRCT | 0:18:03                                               | 16451/KRT  | 0:22:01                                               | 16380/KRT  | 0:14:56                                               |
| 24511/KRT  | 0:18:09                                               | 15500/KRT  | 0:09:08                                               | 14338/KRT  | 0:13:37                                               |
| 24336/KRT  | 1:12:39                                               | 14516/KRB  | 0:16:51                                               | 25059/KRT  | 0:13:14                                               |
| 36558/KRCT | 1:04:30                                               | 23589/KRCT | 0:14:15                                               | 24999/KRCT | 0:15:34                                               |
| 13938/KRB  | 0:18:21                                               | 25159/KRT  | 0:13:15                                               | 12658/KRCT | 1:00:53                                               |
| 12307/KRT  | 0:15:03                                               | 31559/KRCT | 1:17:43                                               | 12878/KRB  | 0:11:21                                               |
| 74534/KRT  | 0:17:33                                               | 35807/KRT  | 0:12:13                                               | 13545/KRCT | 1:18:59                                               |
| 74734/KRT  | 0:08:25                                               | 66588/KRT  | 0:10:33                                               | 74436/KRCT | 0:14:39                                               |
| 53277/KRT  | 1:18:00                                               | 23555/KRB  | 0:15:57                                               | 66751/KRT  | 0:02:05                                               |
| 36558/KRCT | 1:04:30                                               | 17822/KRT  | 0:07:03                                               | 73982/KRB  | 0:20:35                                               |
